# Supplementary material for: On the effectiveness of COVID-19 restrictions and lockdowns: Pan metron ariston
Source: Springer Nature journal article supplement (doi:10.1186/s12889-022-14177-7), 2022-10-01
Supplement: MOESM1 [file 23561694]

# Supplementary material

On the effectiveness of COVID-19 restrictions and lockdowns:

Pan metron ariston

Leonidas Spiliopoulos (spiliopoulos@mpib-berlin.mpg.de, corr. author)

17th July 2022

Max Planck Institute for Human Development, Center for Adaptive Rationality  
94 Lentzeallee, Berlin 14185, Germany  
Phone +49 30 82406-0 (Reception)  
Fax +49 30 8249939

## Other estimates from the main model

Supplementary Table 1: Other estimates from the structural equation model of  $\dot{C}_{i,t}$ ,  $\dot{D}_{i,t}$ ,  $M_{i,t}$  and  $SI_{i,t}$

| $\dot{C}_{i,t}$ | $\dot{D}_{i,t}$           | $SI_{i,t}$                                |                                           |
|-----------------|---------------------------|-------------------------------------------|-------------------------------------------|
| Monday          | -0.0198<br>[-0.167,0.128] | 0.153<br>[-0.0432,0.349]                  | $\alpha_1^3$ -8.621***<br>[-9.903,-7.340] |
| Tuesday         | 0.14<br>[-0.0678,0.347]   | 0.189<br>[-0.0111,0.389]                  | $\alpha_2^3$ -6.679***<br>[-7.437,-5.920] |
| Wednesday       | 0.332***<br>[0.173,0.491] | 0.238*<br>[0.0540,0.423]                  | $\alpha_3^3$ -4.625***<br>[-5.252,-3.999] |
| Thursday        | 0.278***<br>[0.145,0.412] | 0.210*<br>[0.00722,0.413]                 | $\alpha_4^3$ -3.281***<br>[-3.778,-2.784] |
| Friday          | 0.392***<br>[0.263,0.521] | 0.18<br>[-0.000637,0.361]                 | $\alpha_5^3$ -1.993***<br>[-2.413,-1.574] |
| Saturday        | 0.103<br>[-0.00538,0.211] | 0.123<br>[-0.0604,0.307]                  | $\alpha_6^3$ -0.808***<br>[-1.192,-0.425] |
|                 |                           | $\alpha_7^3$ 0.232<br>[-0.131,0.594]      |                                           |
|                 |                           | $\alpha_8^3$ 1.289***<br>[0.944,1.635]    |                                           |
|                 |                           | $\alpha_9^3$ 2.617***<br>[2.249,2.984]    |                                           |
|                 |                           | $\alpha_{10}^3$ 4.470***<br>[4.016,4.924] |                                           |

Supplementary Table 2: Total effects of SI ranges on the growth rate of confirmed cases

|        | Coef.   | $p$   | 95% CI  |         |
|--------|---------|-------|---------|---------|
| 1–10   | -4.383  | 0.140 | -10.202 | 1.436   |
| 11–20  | -5.544  | 0.012 | -9.880  | -1.209  |
| 21–30  | -10.173 | 0.000 | -14.473 | -5.874  |
| 31–40  | -12.945 | 0.000 | -16.883 | -9.007  |
| 41–50  | -13.549 | 0.000 | -17.424 | -9.674  |
| 51–60  | -14.156 | 0.000 | -18.013 | -10.298 |
| 61–70  | -14.426 | 0.000 | -18.319 | -10.534 |
| 71–80  | -14.080 | 0.000 | -17.953 | -10.208 |
| 81–90  | -13.647 | 0.000 | -17.531 | -9.763  |
| 91–100 | -11.958 | 0.000 | -15.906 | -8.010  |

Supplementary Table 3: Difference between the maximum effectiveness level of restrictions for confirmed cases (61–70)

| Relative to 61–70 | $\chi^2(1)$ | $p$    |
|-------------------|-------------|--------|
| 1–10              | 18.310      | 0.0002 |
| 11–20             | 43.220      | 0.0000 |
| 21–30             | 21.300      | 0.0000 |
| 31–40             | 13.910      | 0.0017 |
| 41–50             | 9.410       | 0.0193 |
| 51–60             | 2.550       | 0.6496 |
| 71–80             | 3.480       | 0.4392 |
| 81–90             | 8.340       | 0.0343 |
| 91–100            | 43.400      | 0.0000 |
| Joint             | 101.710     | 0.0000 |

Supplementary Table 4: Total effects of SI ranges on the growth rate of deaths

|        | Coef.   | $p$   | 95% CI  |         |
|--------|---------|-------|---------|---------|
| 1–10   | -7.282  | 0.000 | -10.896 | -3.667  |
| 11–20  | -7.885  | 0.000 | -10.791 | -4.979  |
| 21–30  | -12.344 | 0.000 | -15.047 | -9.641  |
| 31–40  | -14.766 | 0.000 | -17.491 | -12.041 |
| 41–50  | -15.238 | 0.000 | -17.901 | -12.576 |
| 51–60  | -15.541 | 0.000 | -18.175 | -12.908 |
| 61–70  | -15.779 | 0.000 | -18.448 | -13.109 |
| 71–80  | -15.444 | 0.000 | -18.104 | -12.785 |
| 81–90  | -15.267 | 0.000 | -17.968 | -12.567 |
| 91–100 | -14.204 | 0.000 | -16.877 | -11.531 |

Supplementary Table 5: Difference between the maximum effectiveness level of restrictions for deaths (61–70)

| Relative to 61–70 | $\chi^2(1)$ | $p$    |
|-------------------|-------------|--------|
| 1–10              | 25.35       | 0      |
| 11–20             | 51.57       | 0      |
| 21–30             | 21.07       | 0      |
| 31–40             | 10.53       | 0.0105 |
| 41–50             | 5.79        | 0.1359 |
| 51–60             | 2.42        | 0.6832 |
| 71–80             | 4.13        | 0.3206 |
| 81–90             | 4.3         | 0.2945 |
| 91–100            | 19.89       | 0.0001 |
| Joint             | 81.64       | 0.0000 |

## Robustness/sensitivity analyses

### Construction of the SI index bins

The results below are derived from the alternative modelling assumption that the SI index is binned into quintiles (0, 1–20, 21–40, 41–60, 61–80, 91–100), instead of deciles.

Supplementary Table 6: Generalized structural equation model of  $\dot{C}_{i,t}$ ,  $\dot{D}_{i,t}$ ,  $M_{i,t}$  and  $SI_{i,t}$  (binned into quintiles)

| $\dot{C}_{i,t}$                                                                                                                            |                                 | $\dot{D}_{i,t}$         |                               | $M_{i,t}$               |                              | $SI_{i,t}$             |                                                 |
|--------------------------------------------------------------------------------------------------------------------------------------------|---------------------------------|-------------------------|-------------------------------|-------------------------|------------------------------|------------------------|-------------------------------------------------|
| $M_{i,t-7}$                                                                                                                                | -0.0416***<br>[-0.0567,-0.0265] | $M_{i,t-21}$            | -0.0173*<br>[0.0307,-0.00401] |                         |                              |                        |                                                 |
| $SI_{i,t-14}$                                                                                                                              |                                 | $SI_{i,t-28}$           |                               | $SI_{i,t-7}$            |                              |                        |                                                 |
| 1–20                                                                                                                                       | -5.879**<br>[-10.26,-1.500]     | 1–20                    | -7.939***<br>[-10.77,-5.111]  |                         | -3.566<br>[-10.01,2.880]     |                        |                                                 |
| 21–40                                                                                                                                      | -12.53***<br>[-16.70,-8.367]    | 21–40                   | -14.05***<br>[-16.72,-11.39]  |                         | -10.50***<br>[-14.81,-6.188] |                        |                                                 |
| 41–60                                                                                                                                      | -14.42***<br>[-18.43,-10.41]    | 41–60                   | -15.47***<br>[-18.08,-12.86]  |                         | -15.33***<br>[-19.04,-11.61] |                        |                                                 |
| 61–80                                                                                                                                      | -15.19***<br>[-19.22,-11.16]    | 61–80                   | -15.86***<br>[-18.51,-13.21]  |                         | -24.87***<br>[-29.05,-20.69] |                        |                                                 |
| 81–100                                                                                                                                     | -14.82***<br>[-18.89,-10.75]    | 81–100                  | -15.55***<br>[-18.24,-12.86]  |                         | -40.06***<br>[-44.92,-35.20] |                        |                                                 |
| $Tpop_{i,t-14}$                                                                                                                            | -0.18<br>[-0.415,0.0552]        | $Tpop_{i,t-28}$         | -0.113<br>[-0.315,0.0890]     | $\dot{C}_{i,t-7}$       | -0.244***<br>[-0.290,-0.198] | $\dot{C}_{i,t-7}$      | 0.0395***<br>[0.0254,0.0536]                    |
| $V_{i,t-14}$                                                                                                                               | -0.0194**<br>[-0.0340,-0.00490] | $V_{i,t-28}$            | -0.0198*<br>[0.0361,-0.00346] |                         |                              | $I [\dot{C}_{i,t-7}$   | 0.544***<br>- $\dot{C}_{i,t-14}]$ [0.463,0.625] |
| $TP_{i,t-14}(1)$                                                                                                                           | -4.311***<br>[-6.671,-1.950]    | $TP_{i,t-28}(1)$        | -2.640**<br>[-4.590,-0.690]   |                         |                              |                        |                                                 |
| $TP_{i,t-14}(2)$                                                                                                                           | -6.482***<br>[-8.877,-4.087]    | $TP_{i,t-28}(2)$        | -4.360***<br>[-6.369,-2.351]  |                         |                              |                        |                                                 |
| $TP_{i,t-14}(3)$                                                                                                                           | -7.378***<br>[-9.821,-4.935]    | $TP_{i,t-28}(3)$        | -4.977***<br>[-7.077,-2.877]  |                         |                              |                        |                                                 |
| $CT_{i,t-14}(1)$                                                                                                                           | -0.835<br>[-2.043,0.372]        | $CT_{i,t-28}(1)$        | -0.636<br>[-1.667,0.395]      |                         |                              |                        |                                                 |
| $CT_{i,t-14}(2)$                                                                                                                           | -0.873<br>[-2.045,0.299]        | $CT_{i,t-28}(2)$        | -0.637<br>[-1.669,0.396]      |                         |                              |                        |                                                 |
| $\alpha^1$                                                                                                                                 | 21.97***<br>[17.87,26.08]       | $\alpha^2$              | 20.73***<br>[18.32,23.14]     | $\alpha^3$              | 3.827*<br>[0.356,7.297]      |                        |                                                 |
| $\sigma_{\lambda,1}^2$                                                                                                                     | 3.736***<br>[2.442,5.030]       | $\sigma_{\lambda,2}^2$  | 2.537***<br>[1.554,3.520]     |                         |                              | $\sigma_{\lambda,4}^2$ | 3.350***<br>[2.344,4.355]                       |
| $\sigma_{\epsilon,1}^2$                                                                                                                    | 22.48***<br>[18.05,26.91]       | $\sigma_{\epsilon,2}^2$ | 33.91***<br>[29.57,38.24]     | $\sigma_{\epsilon,3}^2$ | 220.9***<br>[180.6,261.3]    |                        |                                                 |
| $\sigma_{\lambda,12}=3.001*** [1.948,4.055]$ , $\sigma_{\lambda,14}=2.163*** [1.378,2.948]$ , $\sigma_{\lambda,24}=1.853*** [1.135,2.572]$ |                                 |                         |                               |                         |                              |                        |                                                 |
| [95% CI],* p<0.05, **p<0.01, *** p<0.001                                                                                                   |                                 |                         |                               |                         |                              |                        |                                                 |

### Robustness to different COVID-19 waves and SARS-CoV-2 variants

The tables below examine the robustness of the results to alternative restrictions on the date range used for estimation, implicitly varying which waves were included and correspondingly which COVID-19 variants. Table 7 presents the results corresponding to the first wave only (from February 15, 2020 to June 30, 2020). Table 8 presents the results corresponding to the first and second waves, excluding the third wave and the emergence of the Alpha variant (from February 15, 2020 to December 31, 2020).

Supplementary Table 7: Generalized structural equation model of  $\dot{C}_{i,t}$ ,  $\dot{D}_{i,t}$ ,  $M_{i,t}$  and  $SI_{i,t}$  (1st wave)

| $\dot{C}_{i,t}$                                                                                                                           |                              | $\dot{D}_{i,t}$         |                              | $M_{i,t}$               |                               | $SI_{i,t}$                                                                           |                              |
|-------------------------------------------------------------------------------------------------------------------------------------------|------------------------------|-------------------------|------------------------------|-------------------------|-------------------------------|--------------------------------------------------------------------------------------|------------------------------|
| $M_{i,t-7}$                                                                                                                               | -0.0108<br>[-0.0361,0.0146]  | $M_{i,t-21}$            | 0.0285*<br>[0.00491,0.0521]  |                         |                               |                                                                                      |                              |
| $SI_{i,t-14}$                                                                                                                             |                              | $SI_{i,t-28}$           |                              | $SI_{i,t-7}$            |                               |                                                                                      |                              |
| 1-10                                                                                                                                      | -0.901<br>[-6.321,4.519]     |                         | -6.572***<br>[-10.21,-2.933] | 1-10                    | -0.556<br>[-3.975,2.864]      |                                                                                      |                              |
| 11-20                                                                                                                                     | -1.2<br>[-5.217,2.817]       |                         | -5.575***<br>[-8.895,-2.255] | 11-20                   | -3.856<br>[-9.974,2.262]      |                                                                                      |                              |
| 21-30                                                                                                                                     | -6.423**<br>[-10.68,-2.163]  |                         | -9.215***<br>[-12.46,-5.969] | 21-30                   | -6.320***<br>[-9.790,-2.851]  |                                                                                      |                              |
| 31-40                                                                                                                                     | -11.06***<br>[-14.94,-7.189] |                         | -13.43***<br>[-16.33,-10.53] | 31-40                   | -11.56***<br>[-14.98,-8.140]  |                                                                                      |                              |
| 41-50                                                                                                                                     | -11.78***<br>[-15.52,-8.040] |                         | -13.34***<br>[-16.28,-10.40] | 41-50                   | -17.64***<br>[-21.00,-14.29]  |                                                                                      |                              |
| 51-60                                                                                                                                     | -14.37***<br>[-17.96,-10.79] |                         | -14.74***<br>[-17.74,-11.74] | 51-60                   | -19.86***<br>[-23.68,-16.05]  |                                                                                      |                              |
| 61-70                                                                                                                                     | -15.19***<br>[-18.87,-11.51] |                         | -15.77***<br>[-18.80,-12.74] | 61-70                   | -24.24***<br>[-28.01,-20.46]  |                                                                                      |                              |
| 71-80                                                                                                                                     | -15.90***<br>[-19.60,-12.20] |                         | -15.75***<br>[-18.73,-12.78] | 71-80                   | -35.02***<br>[-39.44,-30.60]  |                                                                                      |                              |
| 81-90                                                                                                                                     | -16.44***<br>[-20.12,-12.76] |                         | -15.85***<br>[-18.89,-12.80] | 81-90                   | -41.93***<br>[-45.76,-38.11]  |                                                                                      |                              |
| 91-100                                                                                                                                    | -16.89***<br>[-20.83,-12.95] |                         | -15.62***<br>[-18.88,-12.36] | 91-100                  | -56.13***<br>[-60.89,-51.36]  |                                                                                      |                              |
| $Tpop_{i,t-14}$                                                                                                                           | -4.386*<br>[-8.152,-0.620]   | $Tpop_{i,t-28}$         | -3.554*<br>[-6.565,-0.543]   | $\dot{C}_{i,t-7}$       | -0.104***<br>[-0.134,-0.0743] | $\dot{C}_{i,t-7}$                                                                    | -0.00158<br>0.00763,0.00448] |
| $TP_{i,t-14}(1)$                                                                                                                          | -1.086<br>[-3.172,1.001]     | $TP_{i,t-28}(1)$        | 0.67<br>[-1.422,2.761]       |                         |                               | $I \left[ \begin{array}{l} \dot{C}_{i,t-7} \\ -\dot{C}_{i,t-14} \end{array} \right]$ | 0.957***<br>[0.809,1.106]    |
| $TP_{i,t-14}(2)$                                                                                                                          | -3.230**<br>[-5.328,-1.132]  | $TP_{i,t-28}(2)$        | -0.491<br>[-2.747,1.764]     |                         |                               |                                                                                      |                              |
| $TP_{i,t-14}(3)$                                                                                                                          | -4.793***<br>[-7.259,-2.327] | $TP_{i,t-28}(3)$        | -1.927<br>[-4.507,0.653]     |                         |                               |                                                                                      |                              |
| $CT_{i,t-14}(1)$                                                                                                                          | -2.038**<br>[-3.582,-0.494]  | $CT_{i,t-28}(1)$        | -1.069<br>[-2.567,0.429]     |                         |                               |                                                                                      |                              |
| $CT_{i,t-14}(2)$                                                                                                                          | -2.064*<br>[-3.741,-0.387]   | $CT_{i,t-28}(2)$        | -1.007<br>[-2.652,0.639]     |                         |                               |                                                                                      |                              |
| $\alpha^1$                                                                                                                                | 22.60***<br>[18.82,26.38]    | $\alpha^2$              | 19.84***<br>[17.22,22.46]    | $\alpha^3$              | 1.495<br>[-1.030,4.020]       |                                                                                      |                              |
| $\sigma_{\lambda,1}^2$                                                                                                                    | 8.828***<br>[5.450,12.21]    | $\sigma_{\lambda,2}^2$  | 5.461***<br>[3.422,7.500]    |                         |                               | $\sigma_{\lambda,4}^2$                                                               | 4.968***<br>[3.237,6.698]    |
| $\sigma_{\epsilon,1}^2$                                                                                                                   | 60.39***<br>[45.00,75.77]    | $\sigma_{\epsilon,2}^2$ | 107.7***<br>[91.92,123.5]    | $\sigma_{\epsilon,3}^2$ | 189.6***<br>[154.1,225.2]     |                                                                                      |                              |
| $\sigma_{\lambda,12}=6.251***$ [3.734,8.768] , $\sigma_{\lambda,14}=3.955***$ [2.031,5.878] , $\sigma_{\lambda,24}=2.168**$ [0.762,3.574] |                              |                         |                              |                         |                               |                                                                                      |                              |
| [95% CI],* p<0.05, **p<0.01, *** p<0.001                                                                                                  |                              |                         |                              |                         |                               |                                                                                      |                              |

Supplementary Table 8: Generalized structural equation model of  $\dot{C}_{i,t}$ ,  $\dot{D}_{i,t}$ ,  $M_{i,t}$  and  $SI_{i,t}$  (1st and 2nd waves only)

| $\dot{C}_{i,t}$                                                                                                                                     |                                 | $\dot{D}_{i,t}$         |                               | $M_{i,t}$               |                              | $SI_{i,t}$                                                                           |                              |
|-----------------------------------------------------------------------------------------------------------------------------------------------------|---------------------------------|-------------------------|-------------------------------|-------------------------|------------------------------|--------------------------------------------------------------------------------------|------------------------------|
| $M_{i,t-7}$                                                                                                                                         | -0.0474***<br>[-0.0526,-0.0423] | $M_{i,t-21}$            | -0.0133*<br>[0.0239,-0.00276] |                         |                              |                                                                                      |                              |
| $SI_{i,t-14}$                                                                                                                                       |                                 | $SI_{i,t-28}$           |                               | $SI_{i,t-7}$            |                              |                                                                                      |                              |
| 1-10                                                                                                                                                | -2.088***<br>[-2.518,-1.658]    |                         | -6.400***<br>[-6.884,-5.915]  | 1-10                    | -2.233<br>[-6.386,1.920]     |                                                                                      |                              |
| 11-20                                                                                                                                               | -3.153***<br>[-3.512,-2.794]    |                         | -6.417***<br>[-6.777,-6.057]  | 11-20                   | -4.434***<br>[-7.381,-1.488] |                                                                                      |                              |
| 21-30                                                                                                                                               | -9.721***<br>[-10.13,-9.310]    |                         | -12.09***<br>[-12.56,-11.61]  | 21-30                   | -7.236***<br>[-10.16,-4.308] |                                                                                      |                              |
| 31-40                                                                                                                                               | -12.84***<br>[-13.29,-12.39]    |                         | -14.56***<br>[-15.17,-13.96]  | 31-40                   | -12.28***<br>[-15.31,-9.263] |                                                                                      |                              |
| 41-50                                                                                                                                               | -13.53***<br>[-13.99,-13.07]    |                         | -15.13***<br>[-15.81,-14.45]  | 41-50                   | -13.07***<br>[-16.02,-10.12] |                                                                                      |                              |
| 51-60                                                                                                                                               | -14.33***<br>[-14.78,-13.87]    |                         | -15.50***<br>[-16.08,-14.93]  | 51-60                   | -15.45***<br>[-18.43,-12.47] |                                                                                      |                              |
| 61-70                                                                                                                                               | -15.20***<br>[-15.70,-14.70]    |                         | -15.98***<br>[-16.59,-15.37]  | 61-70                   | -19.50***<br>[-22.46,-16.54] |                                                                                      |                              |
| 71-80                                                                                                                                               | -15.27***<br>[-15.78,-14.77]    |                         | -15.66***<br>[-16.34,-14.98]  | 71-80                   | -29.16***<br>[-32.08,-26.23] |                                                                                      |                              |
| 81-90                                                                                                                                               | -15.29***<br>[-15.78,-14.79]    |                         | -15.72***<br>[-16.34,-15.10]  | 81-90                   | -36.97***<br>[-39.92,-34.02] |                                                                                      |                              |
| 91-100                                                                                                                                              | -14.95***<br>[-15.50,-14.39]    |                         | -15.23***<br>[-16.09,-14.37]  | 91-100                  | -53.80***<br>[-56.76,-50.84] |                                                                                      |                              |
| $Tpop_{i,t-14}$                                                                                                                                     | -0.562*<br>[-1.081,-0.0423]     | $Tpop_{i,t-28}$         | -0.482<br>[-1.708,0.743]      | $\dot{C}_{i,t-7}$       | -0.188***<br>[-0.204,-0.172] | $\dot{C}_{i,t-7}$                                                                    | 0.0119***<br>[0.0110,0.0127] |
| $TP_{i,t-14}(1)$                                                                                                                                    | -4.747***<br>[-4.985,-4.509]    | $TP_{i,t-28}(1)$        | -1.973***<br>[-2.221,-1.725]  |                         |                              | $I \left[ \begin{array}{l} \dot{C}_{i,t-7} \\ -\dot{C}_{i,t-14} \end{array} \right]$ | 0.396***<br>[0.377,0.414]    |
| $TP_{i,t-14}(2)$                                                                                                                                    | -6.924***<br>[-7.175,-6.672]    | $TP_{i,t-28}(2)$        | -3.698***<br>[-4.003,-3.392]  |                         |                              |                                                                                      |                              |
| $TP_{i,t-14}(3)$                                                                                                                                    | -8.083***<br>[-8.387,-7.778]    | $TP_{i,t-28}(3)$        | -4.435***<br>[-4.907,-3.962]  |                         |                              |                                                                                      |                              |
| $CT_{i,t-14}(1)$                                                                                                                                    | -1.778***<br>[-1.954,-1.603]    | $CT_{i,t-28}(1)$        | -1.070***<br>[-1.361,-0.780]  |                         |                              |                                                                                      |                              |
| $CT_{i,t-14}(2)$                                                                                                                                    | -2.135***<br>[-2.309,-1.960]    | $CT_{i,t-28}(2)$        | -1.307***<br>[-1.560,-1.055]  |                         |                              |                                                                                      |                              |
| $\alpha^1$                                                                                                                                          | 23.43***<br>[22.13,24.72]       | $\alpha^2$              | 20.76***<br>[19.80,21.71]     | $\alpha^3$              | 2.893<br>[-0.0556,5.841]     |                                                                                      |                              |
| $\sigma_{\lambda,1}^2$                                                                                                                              | 6.061**<br>[1.781,10.34]        | $\sigma_{\lambda,2}^2$  | 3.429**<br>[0.828,6.030]      |                         |                              | $\sigma_{\lambda,4}^2$                                                               | 0.879*<br>[0.143,1.615]      |
| $\sigma_{\epsilon,1}^2$                                                                                                                             | 28.23***<br>[28.14,28.32]       | $\sigma_{\epsilon,2}^2$ | 44.68***<br>[44.54,44.83]     | $\sigma_{\epsilon,3}^2$ | 183.7***<br>[183.2,184.2]    |                                                                                      |                              |
| $\sigma_{\lambda,12}=4.448^{**}$ [1.191,7.705] <sup>†</sup> , $\sigma_{\lambda,14}=1.411$ [-0.195,3.018], $\sigma_{\lambda,24}=1.041$ [-0.139,2.22] |                                 |                         |                               |                         |                              |                                                                                      |                              |
| [95% CI],* p<0.05, **p<0.01, *** p<0.001                                                                                                            |                                 |                         |                               |                         |                              |                                                                                      |                              |
